# Supplementary material
Source: PubMed Central journal article supplement (PMC1693728)

# PML IV

**A**

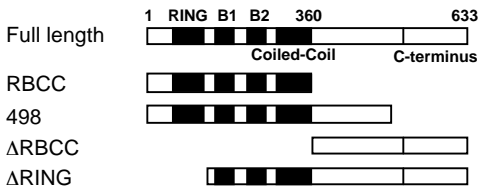

**B**

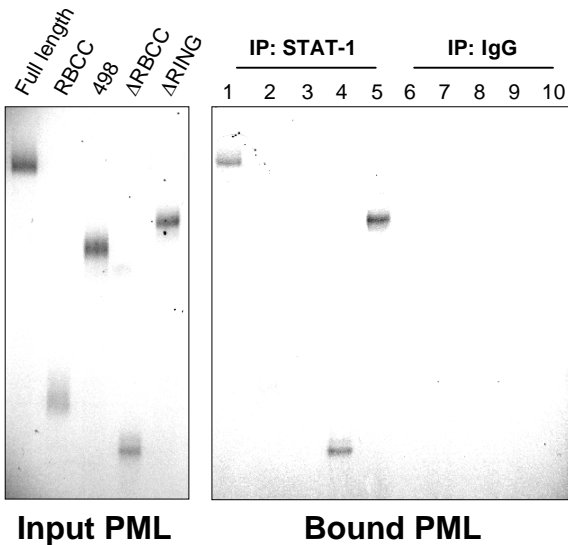

Supplement: pnas_0604800103_1.pdf [file pnas_0604800103_1.pdf]

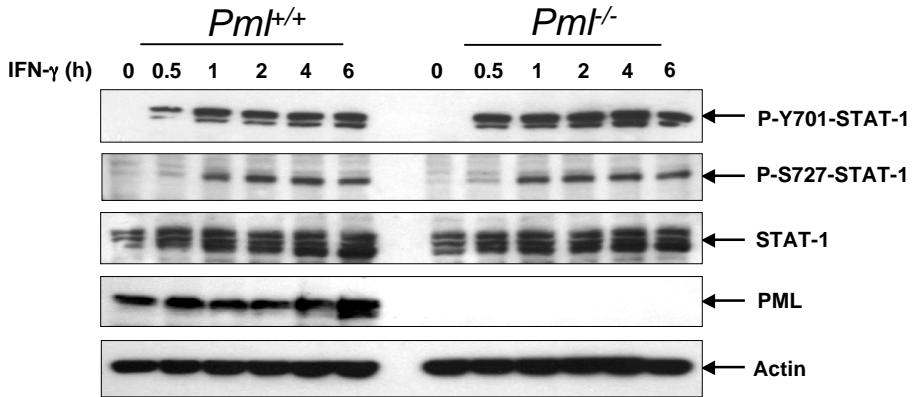

Supplement: pnas_0604800103_2.pdf [file pnas_0604800103_2.pdf]
